# Supplementary material
Source: PubMed Central journal article supplement (PMC3658551)
Supplement: cb300653v_si_001.pdf [file cb300653v_si_001.pdf]

## Supporting Information

# High-Throughput Screening Identifies Small-Molecule Enhancers of Reactive Oxygen Species that are Nontoxic or Cause Genotype-Selective Cell Death

Drew J. Adams<sup>1,4\*</sup>, Zarko V. Boskovic<sup>1,3,4</sup>, Jimmy R. Theriault<sup>2</sup>, Alex J. Wang<sup>1</sup>, Andrew M. Stern<sup>1</sup>, Bridget K. Wagner<sup>1</sup>, Alykhan F. Shamji<sup>1</sup>, Stuart L. Schreiber<sup>1,2,3,4\*</sup>

Affiliations:

<sup>1</sup> Chemical Biology Program, <sup>2</sup> Chemical Biology Platform, Broad Institute, 7 Cambridge Center, Cambridge, MA 02142

<sup>3</sup> Department of Chemistry and Chemical Biology, Harvard University, Cambridge, MA 02138

<sup>4</sup> Howard Hughes Medical Institute, Broad Institute, 7 Cambridge Center, Cambridge, MA 02142

\* Corresponding authors email: [dadams@broadinstitute.org](mailto:dadams@broadinstitute.org); [stuart\\_schreiber@harvard.edu](mailto:stuart_schreiber@harvard.edu)

|                                            |           |
|--------------------------------------------|-----------|
| <b>Supporting Figures 1 through 8.....</b> | <b>2</b>  |
| <b>Supporting Table 1.....</b>             | <b>11</b> |

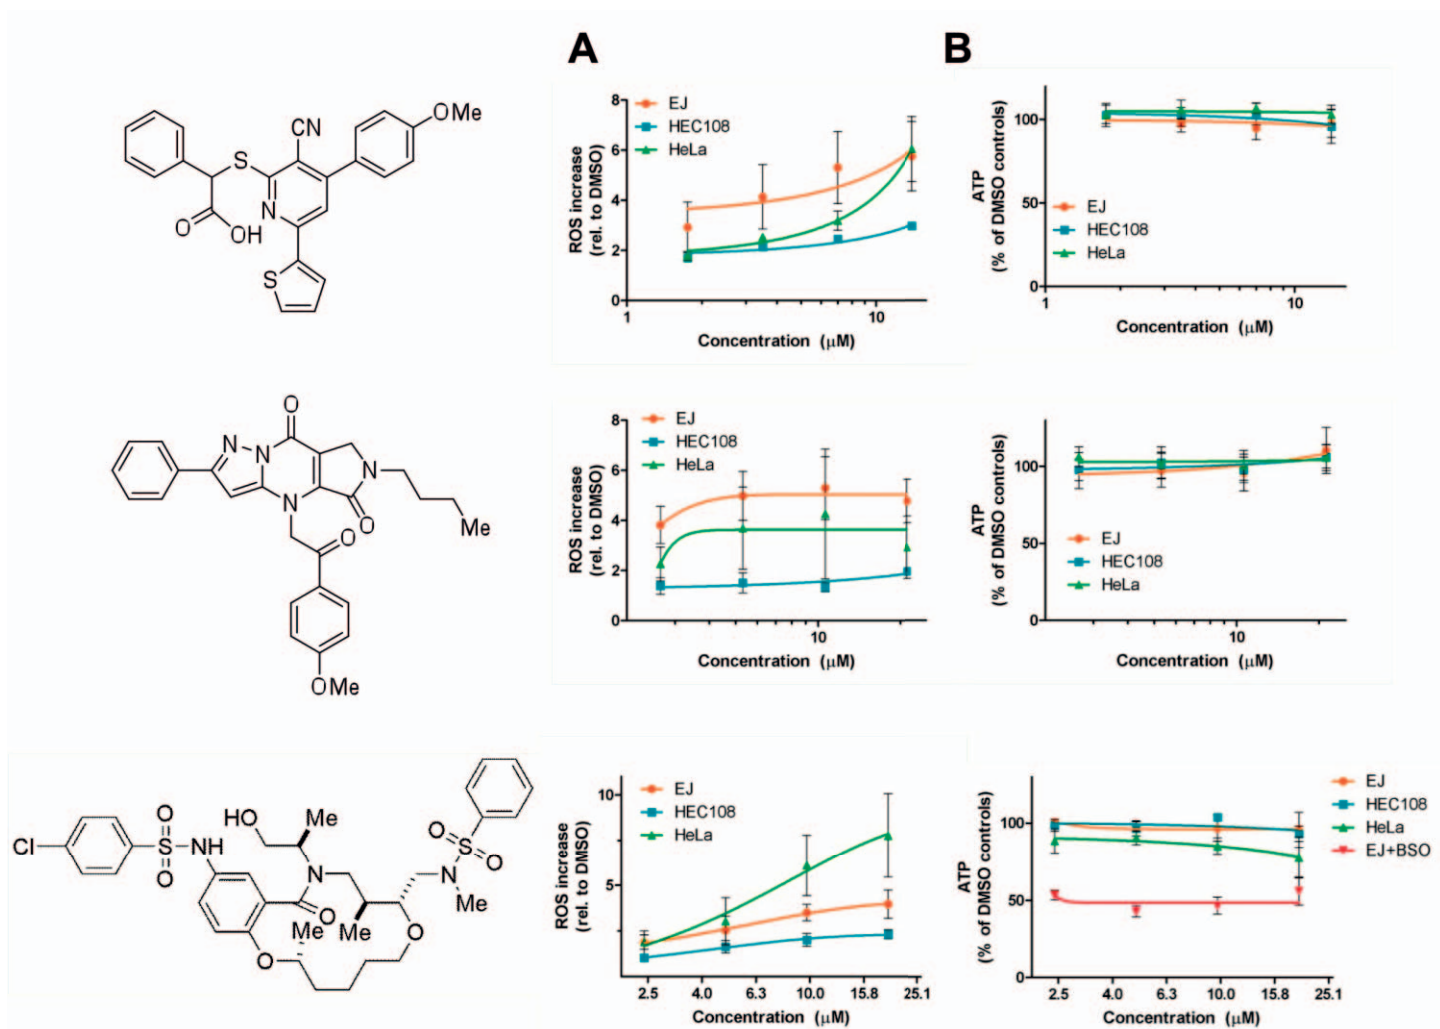

**Supporting Figure 1.** Three additional ROS-enhancing nontoxic compounds. A) Elevation of ROS for the indicated compounds after 1 hour in three cell lines. B) ATP levels after 48h in the same cell line panel. All data are expressed as mean $\pm$ SD, n = 3.

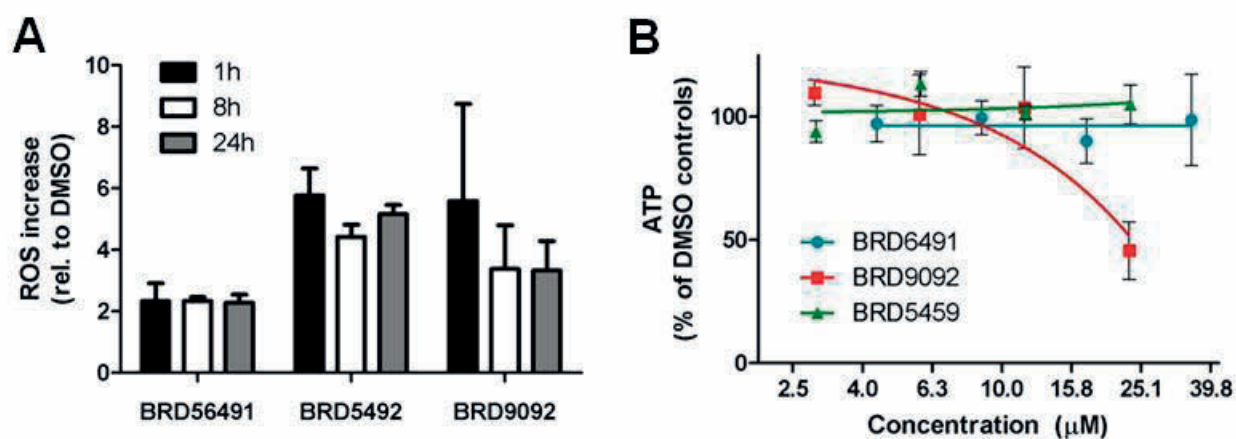

**Supporting Figure 2.** A) ROS levels were measured for 1, 8, and 24 hours in HeLa cells for three leading compounds, and normalized to DMSO treatment. B) Evaluation of cellular viability after 5-day treatment with the indicated concentrations of each compound in HEC108 cells. All data are expressed as mean $\pm$ SD, n = 3.

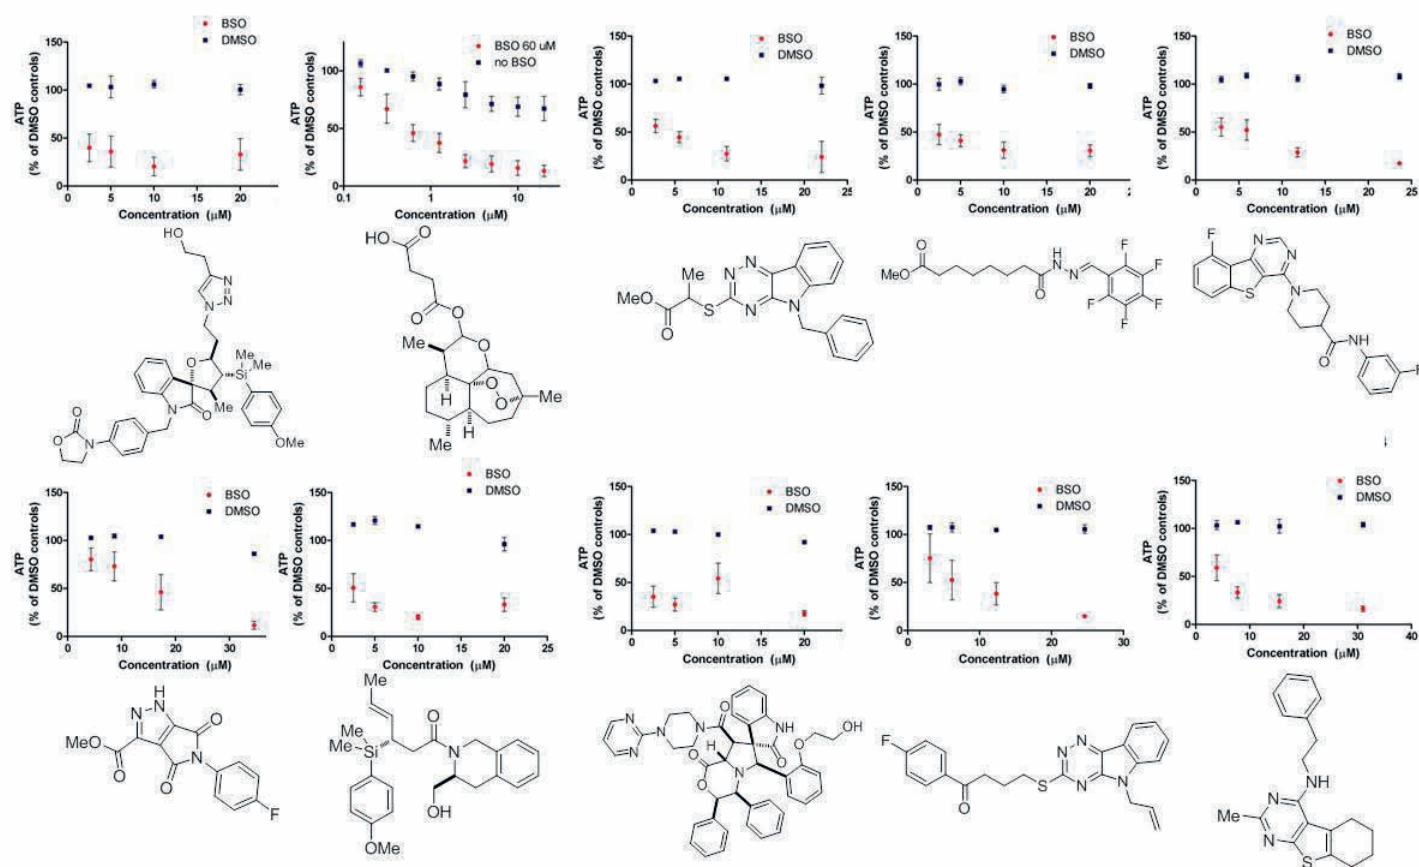

**Supporting Figure 3A.** Viability in EJ cells following 48-h treatment with ROS-enhancing small molecules only (blue) or co-treatment with nontoxic doses of BSO (red). All data are expressed as mean $\pm$ SD, n = 3. Continues on next page.

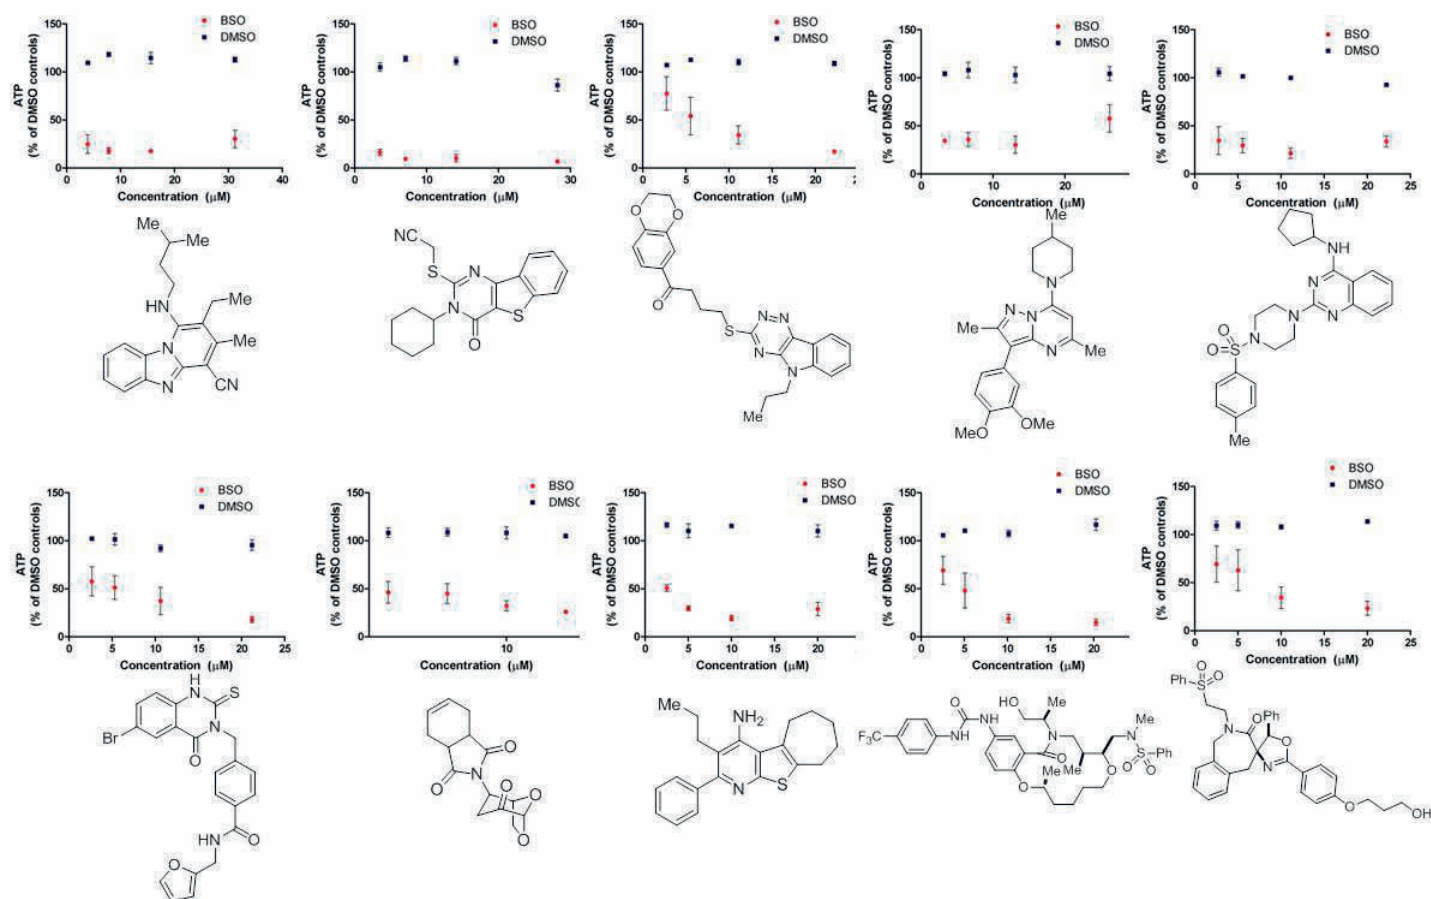

**Supporting Figure 3B.** Viability in EJ cells following 48-h treatment with ROS-enhancing small molecules only (blue) or co-treatment with nontoxic doses of BSO (red). All data are expressed as mean $\pm$ SD, n = 3. Continued from previous page.

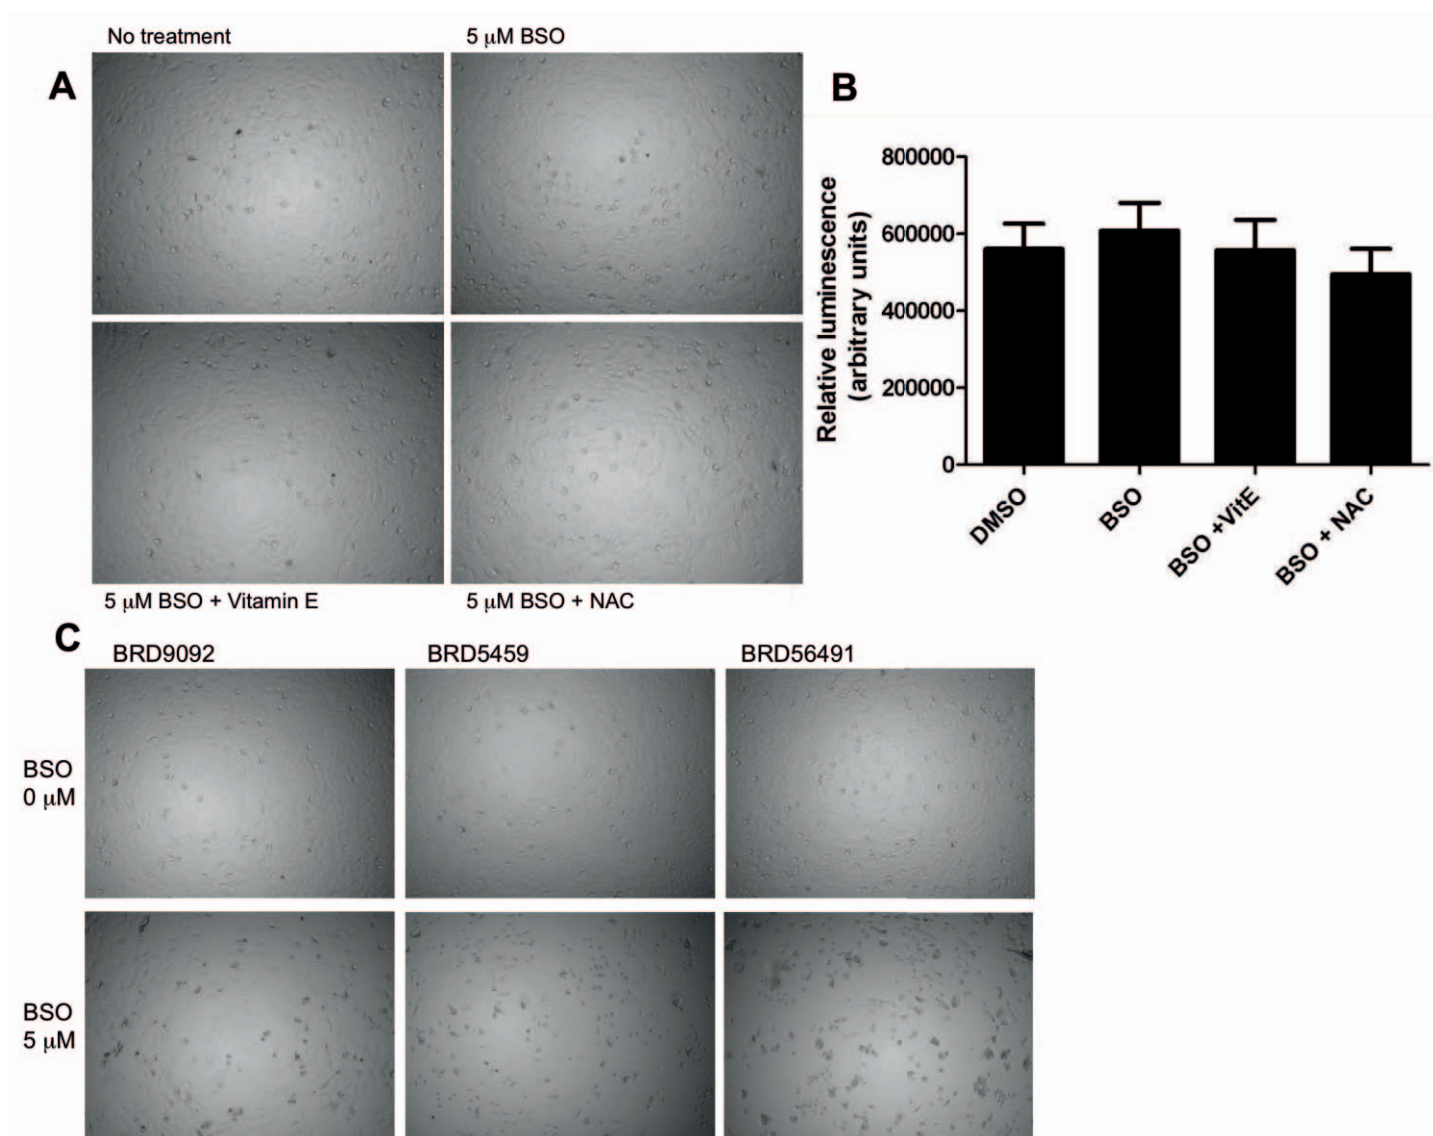

**Supporting Figure 4.** A) Bright-field microscopy images following 48-h BSO treatment with or without chemical antioxidants. B) For the conditions shown in A, ATP levels were obtained after 48-h treatment. Data are presented as mean $\pm$ SD for four technical replicates and are representative of three independent experiments. C) Bright-field microscopy images following 48-h treatment with nontoxic ROS-enhancing compound treatments alone (upper), or co-treatment with BSO (lower). Morphological changes indicative of cell death are observed with BSO co-treatment. All experiments were performed in EJ cells.

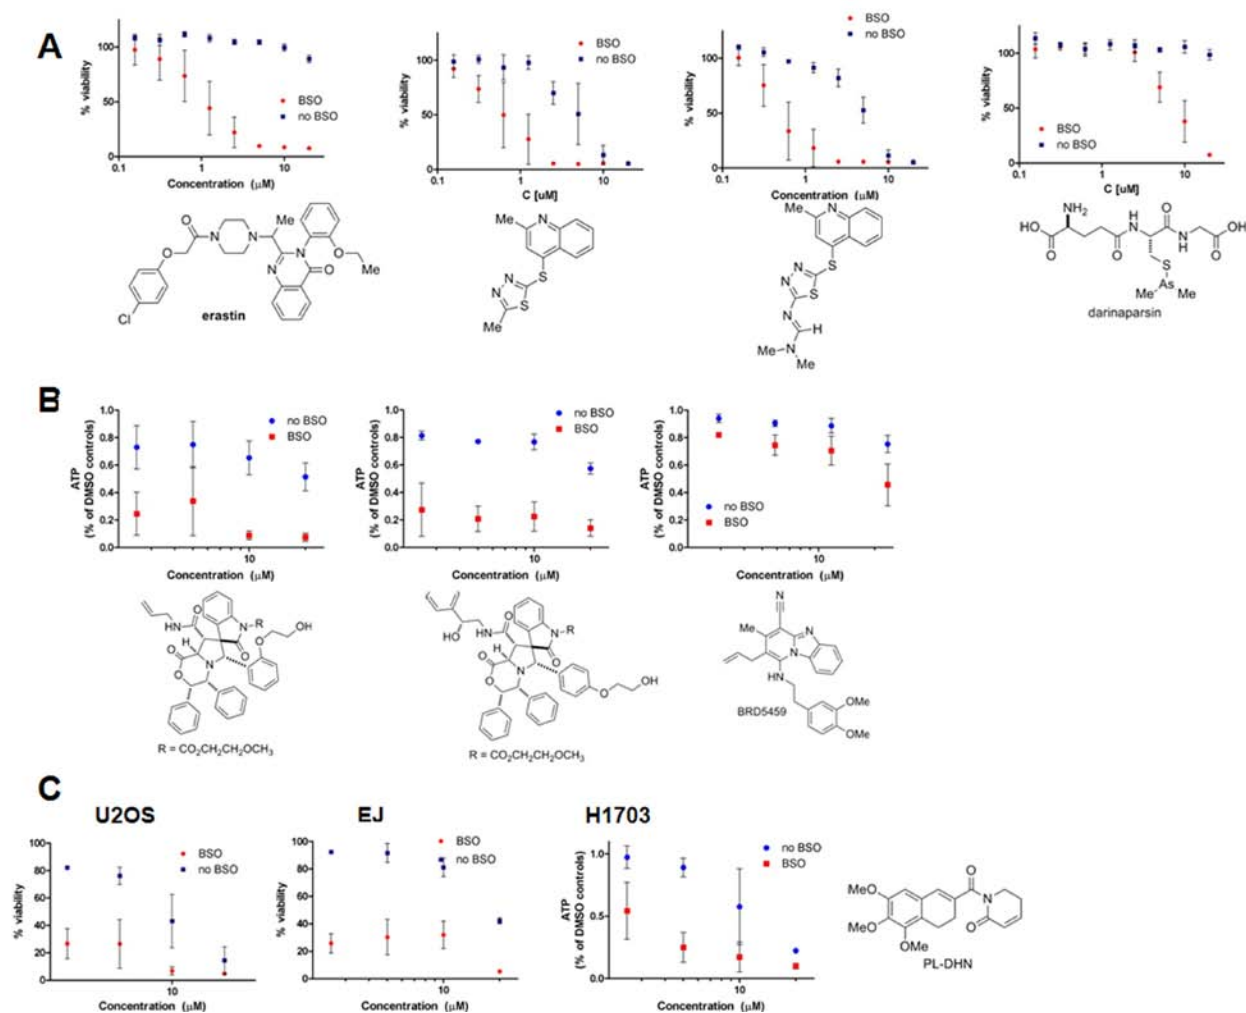

**Supporting Figure 5.** **A)** In U2OS cells, a distinct and in some cases structurally-related set of ROS-enhancing small molecules show strongly enhanced potency for reduction of cellular ATP levels when co-treated with a nontoxic dose of BSO (30  $\mu\text{M}$ ). **B)** In H1703 cells, a distinct and in some cases structurally-related set of ROS-enhancing small molecules show strongly enhanced potency for reduction of cellular ATP levels when co-treated with a nontoxic dose of BSO (10  $\mu\text{M}$ ). **C)** PL-DHN, a piperlongumine analog previously shown to enhance ROS and deplete glutathione levels in analogy to piperlongumine but with reduced cell death, shows strongly reduced viability when co-treated with BSO in three cell lines (EJ 5  $\mu\text{M}$ , U2OS 30  $\mu\text{M}$ , H1703 10  $\mu\text{M}$ ). All data expressed as mean $\pm$ SD,  $n = 3$  except H1703 cells plus 10  $\mu\text{M}$  BSO,  $n = 2$ .

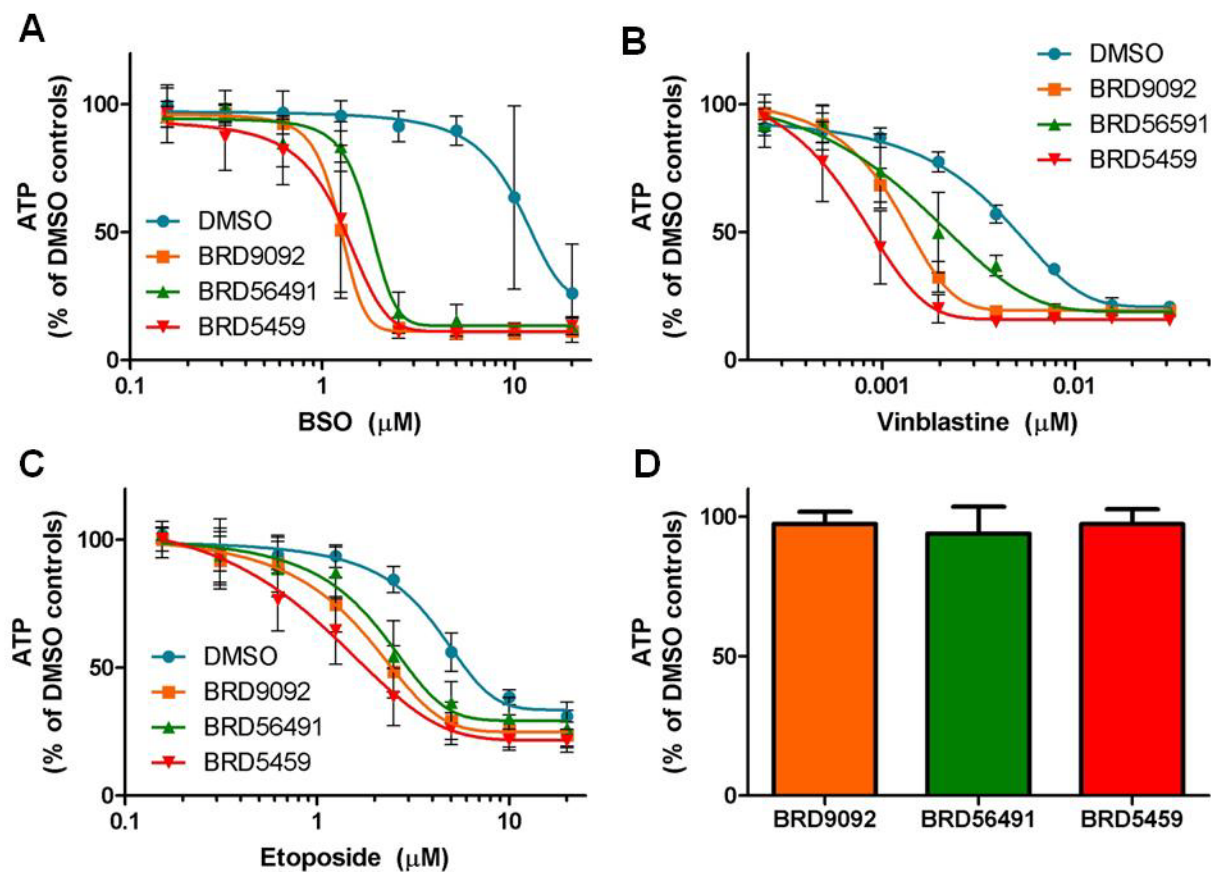

**Supporting Figure 6.** ATP levels in EJ cells measured following 48-h treatment with the indicated compounds co-treated with varying concentrations of BSO (A), vinblastine (B), and etoposide (C). D) ATP levels measured following 48-h treatment with the indicated compounds alone. All data are expressed as mean $\pm$ SD, n = 3



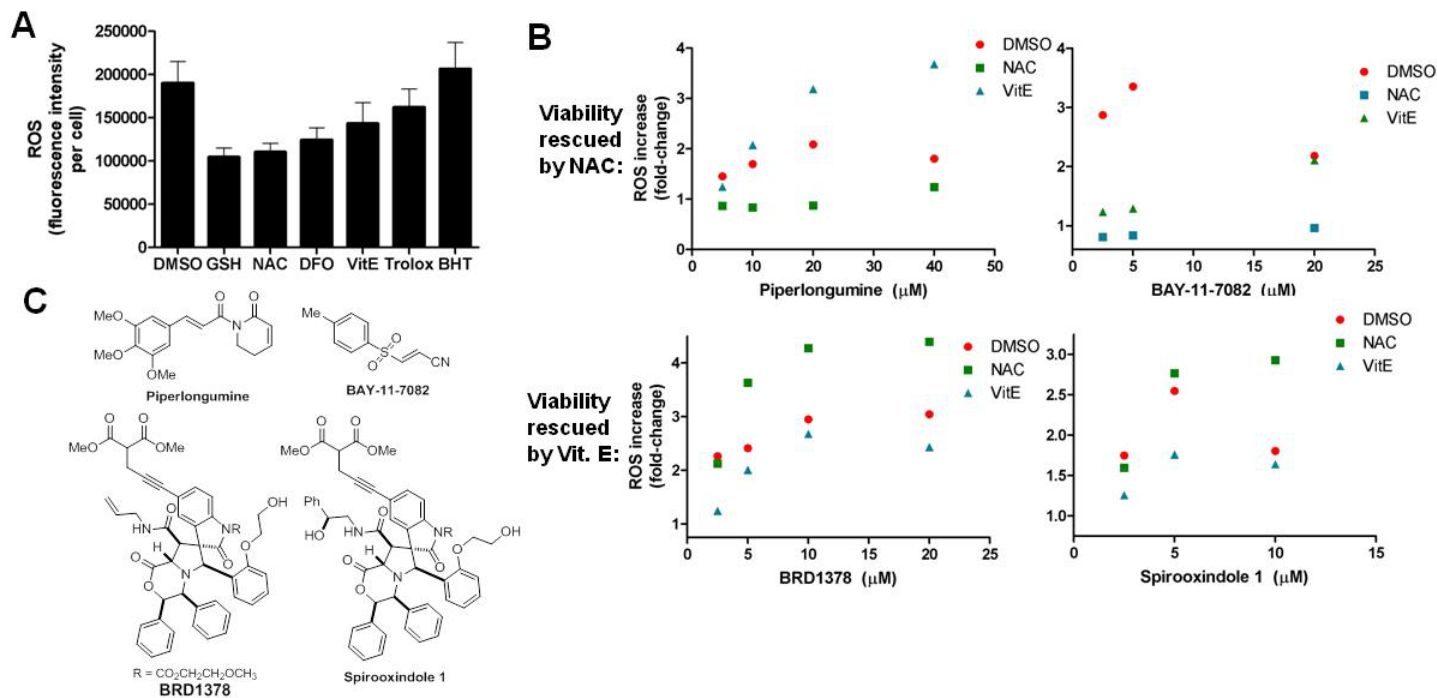

**Supporting Figure 7. A)** Antioxidants lower cellular ROS. EJ cells were treated for 2h and stained with CM-H<sub>2</sub>DCF-DA. Data are expressed as mean±SD for at least 48 technical replicates and are representative of three independent experiments. **B)** For a subset of compounds for which NAC (top) or vitamin E (bottom) rescues viability, ROS levels were measured with and without antioxidant treatment and fold-change was calculated relative to antioxidant (or DMSO) alone. NAC suppresses ROS increase for piperlongumine and BAY-11-7082, while vitamin E mitigates the increases observed for BRD1378 and Spirooxindole 1. Data are expressed as mean of two technical replicates and are representative of three independent experiments. **C)** Compounds employed in panel B).

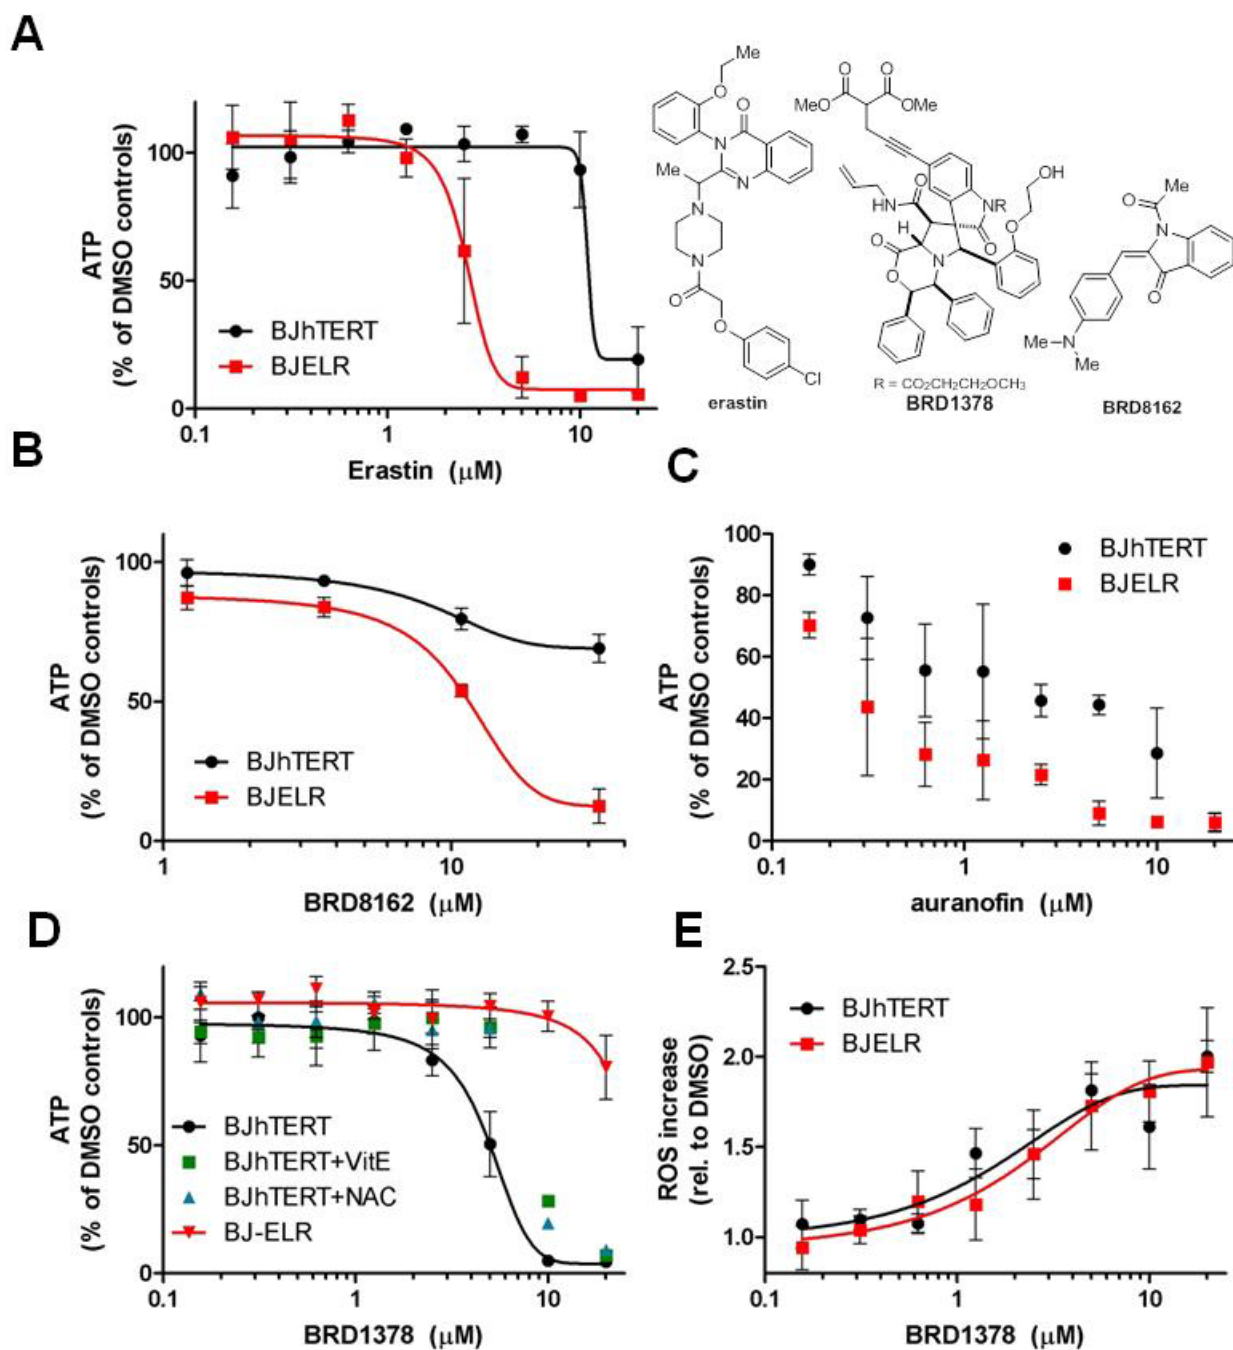

**Supporting Figure 8.** ATP levels measured in BJhTERT and BJELR cells after 48-h treatment with erastin (A) and several electrophilic small molecules (B-C). All data are expressed as mean $\pm$ SD,  $n = 3$ . D) Measurement of ATP levels in BJhTERT and BJELR after 48-h treatment with BRD1378. E) ROS increase measured in BJhTERT and BJELR following 1-h BRD1378 treatment. In contrast to the observed selective toxicity, ROS increase is similar in BJhTERT and BJELR. All data are expressed as mean $\pm$ SD,  $n = 3$ .





| Compound Structure                                                                  | NAC |      | GSH |      | vit. E |      | Trolox |      | DFO |      | BHT |      |
|-------------------------------------------------------------------------------------|-----|------|-----|------|--------|------|--------|------|-----|------|-----|------|
|                                                                                     | EJ  | U2OS | EJ  | U2OS | EJ     | U2OS | EJ     | U2OS | EJ  | U2OS | EJ  | U2OS |
| 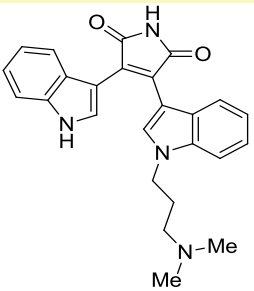   | yes |      |     |      |        |      |        |      |     |      |     |      |
|    | yes | yes  |     |      |        |      |        |      |     |      |     |      |
|    | yes | yes  |     |      |        |      |        |      |     |      |     |      |
|  | yes | yes  | yes | yes  |        |      |        |      |     |      |     |      |
|  | yes | yes  | yes | yes  |        |      |        |      | yes |      |     |      |
|  | yes | yes  | yes | yes  |        |      |        |      |     |      |     |      |
|  | yes | yes  | yes | yes  |        |      |        |      |     |      |     |      |
|  | yes | yes  | yes | yes  |        |      |        |      | yes | yes  |     |      |





| Compound<br>Structure                                                               | NAC |      | GSH |      | vit. E |      | Trolox |      | DFO |      | BHT |      |
|-------------------------------------------------------------------------------------|-----|------|-----|------|--------|------|--------|------|-----|------|-----|------|
|                                                                                     | EJ  | U2OS | EJ  | U2OS | EJ     | U2OS | EJ     | U2OS | EJ  | U2OS | EJ  | U2OS |
| 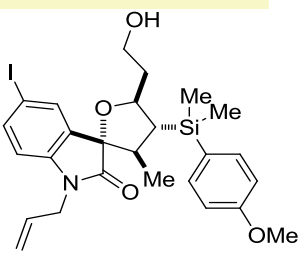   |     |      |     |      | yes    | yes  |        |      |     |      |     |      |
|    |     |      |     |      |        | yes  |        |      |     |      |     |      |
|   |     |      |     |      | yes    |      |        |      |     | yes  |     |      |
|  |     |      |     |      |        | yes  |        |      |     |      |     |      |
|  |     |      |     |      |        |      |        |      |     |      |     |      |
|  |     |      |     |      | yes    |      |        |      |     |      |     |      |



| Compound<br>Structure                                                               | NAC |      | GSH |      | vit. E |      | Trolox |      | DFO |      | BHT |      |
|-------------------------------------------------------------------------------------|-----|------|-----|------|--------|------|--------|------|-----|------|-----|------|
|                                                                                     | EJ  | U2OS | EJ  | U2OS | EJ     | U2OS | EJ     | U2OS | EJ  | U2OS | EJ  | U2OS |
| 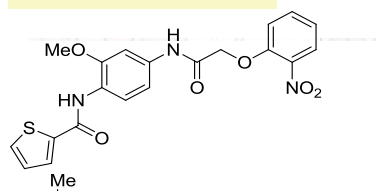   |     |      |     |      |        |      |        |      |     |      |     |      |
|    |     |      |     |      |        |      |        |      |     |      |     |      |
|    |     |      |     |      |        |      |        |      |     |      |     |      |
|   |     |      |     |      |        |      |        |      |     |      |     |      |
|  |     |      |     |      |        |      |        |      |     |      |     |      |
|  |     |      |     |      |        |      |        |      |     |      |     |      |

yes

yes

yes

yes

yes

yes

yes

yes
